# Supplementary material for: In situ encapsulation of ultrasmall MoO3 nanoparticles into beta zeolite for oxidative desulfurization
Source: Royal Society of Chemistry journal article supplement (doi:10.1039/d3gc04808j), 2024-01-01
Supplement: d3gc04808j1.pdf [file d3gc04808j1.pdf]

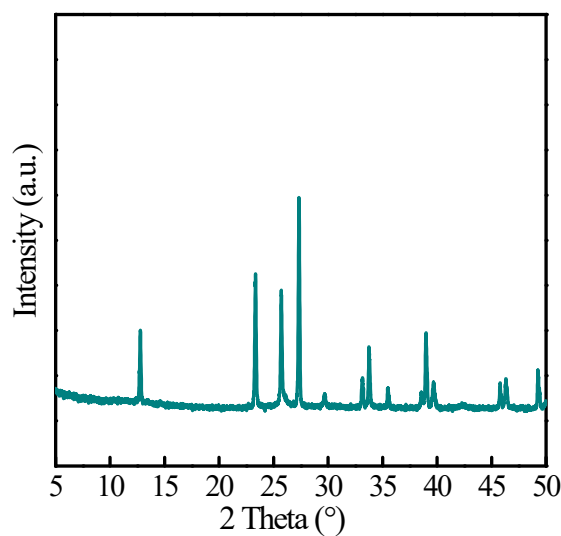

**Fig. S1** XRD pattern of MoO<sub>3</sub> sample.

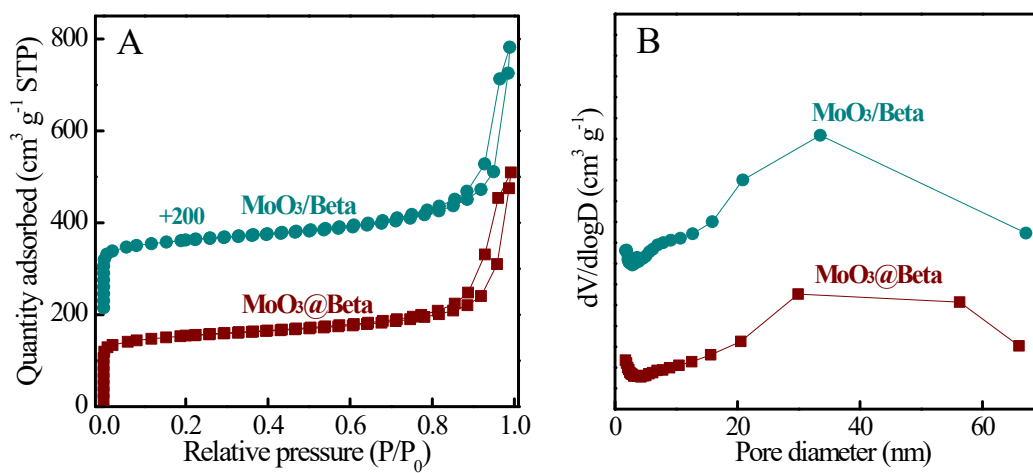

**Fig. S2** (A) N<sub>2</sub> adsorption–desorption isotherms and (B) pore diameter distribution of MoO<sub>3</sub>@Beta and MoO<sub>3</sub>/Beta samples.

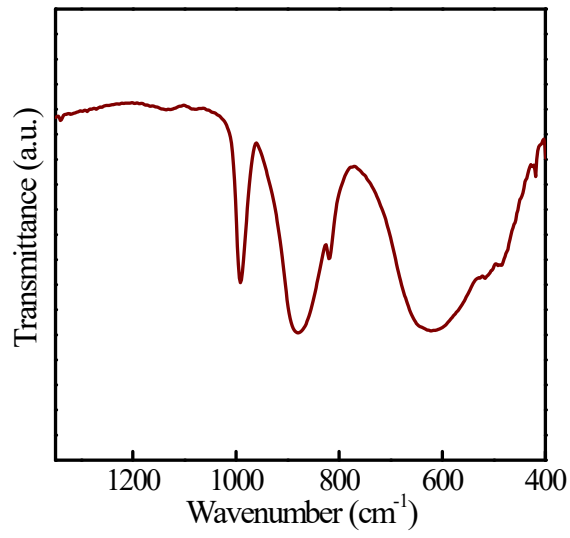

**Fig. S3** FT-IR spectrum of MoO<sub>3</sub> sample.

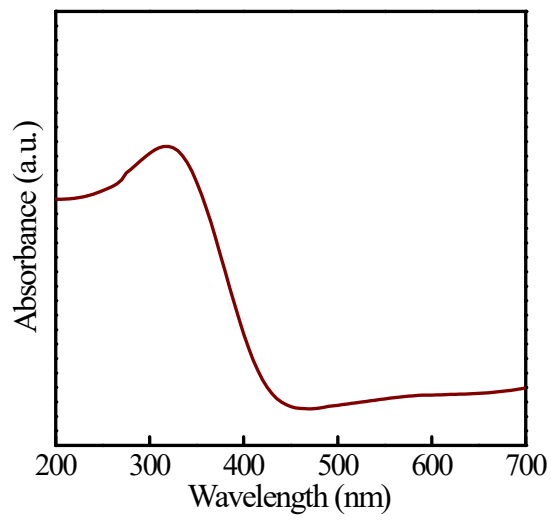

**Fig. S4** UV-Vis spectrum of MoO<sub>3</sub> sample.

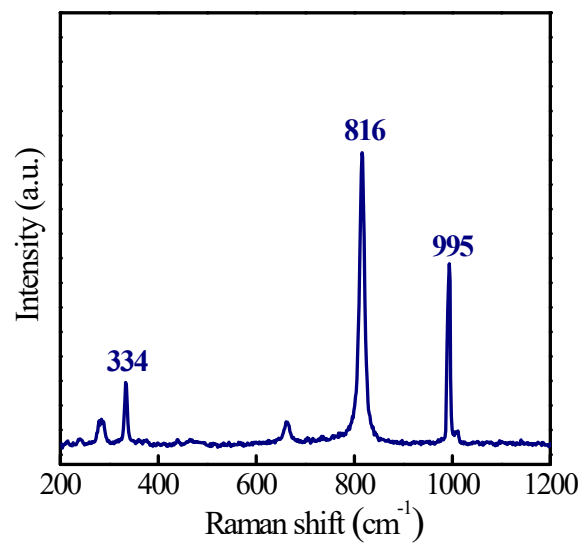

**Fig. S5** UV Raman spectrum of MoO<sub>3</sub> sample.

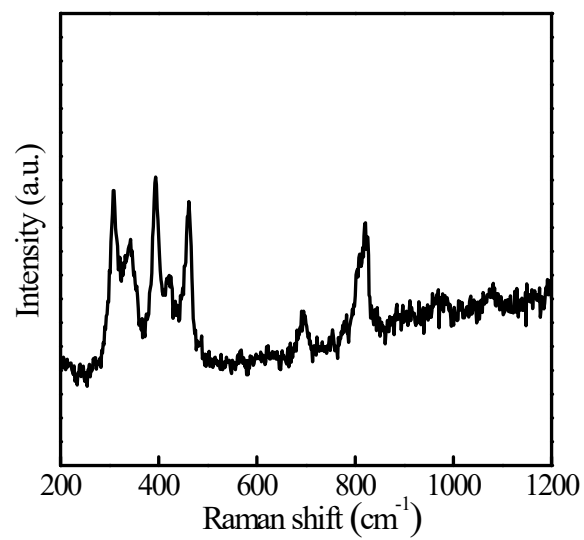

**Fig. S6** UV Raman spectrum of Beta sample.

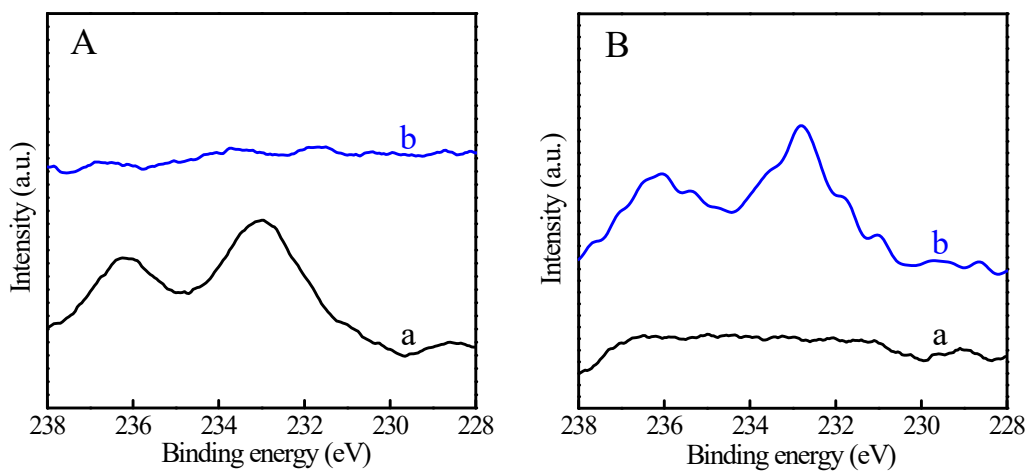

**Fig. S7** Mo 3d XPS spectra with the etching depth of 0 nm (a) and 30 nm (b) over (A) MoO<sub>3</sub>/Beta and (B) MoO<sub>3</sub>@Beta samples.

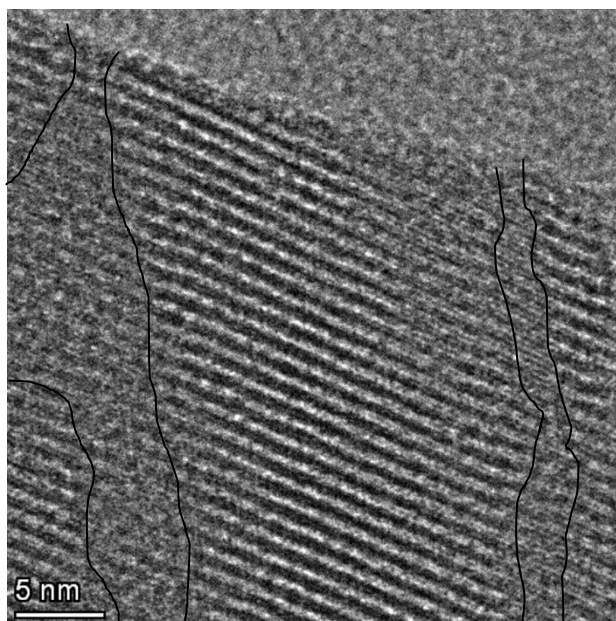

**Fig. S8** High resolution TEM image of MoO<sub>3</sub>@Beta sample. The yellow dash line indicated the presence of intracrystalline mesopores within zeolite crystal.

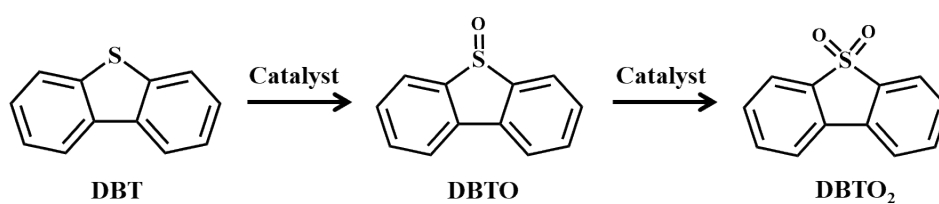

**Scheme S1** Reaction pathways of DBT oxidation.

**Table S1** Catalytic activity of various catalysts for oxidative desulfurization of DBT with molecular O<sub>2</sub>.<sup>a</sup>

| No. | Catalyst               | Mo loading <sup>b</sup> (wt%) | Conversion <sup>c</sup> (%) |
|-----|------------------------|-------------------------------|-----------------------------|
| 1   | MoO <sub>3</sub>       | -                             | < 1.0                       |
| 2   | MoO <sub>3</sub> /Beta | 1.00                          | < 1.0                       |
| 3   | MoO <sub>3</sub> @Beta | 0.95                          | < 1.0                       |

<sup>a</sup> Reaction conditions: catalyst, 0.02 g; model oil (S content, decalin, 500 µg mL<sup>-1</sup>), 20 mL; O<sub>2</sub> pressure, 1 atm.; flow rate of O<sub>2</sub>, 60 mL min<sup>-1</sup>; temperature, 90 °C; time, 3 h.

<sup>b</sup> Calculated by ICP.

<sup>c</sup> Conversion = moles of DBT converted/initial moles of DBT × 100%.

**Table S2** Comparison of TOF values over heterogeneous catalysts with the oxidant of O<sub>2</sub> or air.

| Catalyst                                                          | Sulfide | Oxidant        | Reaction conditions       | Conversion (%) | TOF (h <sup>-1</sup> ) | Ref.      |
|-------------------------------------------------------------------|---------|----------------|---------------------------|----------------|------------------------|-----------|
| Mo@Beta                                                           | DBT     | O <sub>2</sub> | 90 °C, 1 mg/1 mL, 6 h     | 100            | 26.3                   | This work |
| Mo@Beta                                                           | DBT     | O <sub>2</sub> | 100 °C, 1 mg/1 mL, 5 h    | 100            | 31.6                   | This work |
| CoMo nanosheet                                                    | DBT     | air            | 80 °C, 10 mg/20 mL, 5 h   | 38.0           | 5.2                    | 1         |
| CoMo nanosheet                                                    | DBT     | air            | 90 °C, 10 mg/20 mL, 5 h   | 70.0           | 9.6                    | 1         |
| CoMo nanosheet                                                    | DBT     | air            | 100 °C, 10 mg/20 mL, 5 h  | 100.0          | 13.6                   | 1         |
| CoMo nanosheet                                                    | DBT     | air            | 110 °C, 10 mg/20 mL, 2 h  | 100.0          | 34.1                   | 1         |
| Co-Mo-O                                                           | DBT     | air            | 80 °C, 100 mg/20 mL, 9 h  | 75.0           | 0.2                    | 2         |
| Co-Mo-O                                                           | DBT     | air            | 100 °C, 100 mg/20 mL, 6 h | 82.0           | 0.4                    | 2         |
| Co-Mo-O                                                           | DBT     | air            | 120 °C, 100 mg/20 mL, 3 h | 100            | 0.9                    | 2         |
| Ce-Mo-O                                                           | DBT     | air            | 80 °C, 100 mg/20 mL, 8 h  | 30.0           | 0.1                    | 3         |
| Ce-Mo-O                                                           | DBT     | air            | 90 °C, 100 mg/20 mL, 8 h  | 50.0           | 0.1                    | 3         |
| Ce-Mo-O                                                           | DBT     | air            | 100 °C, 100 mg/20 mL, 6 h | 100            | 0.4                    | 3         |
| Q <sub>5</sub> IMo <sub>6</sub> O <sub>24</sub>                   | DBT     | O <sub>2</sub> | 80 °C, 10 mg/50 mL, 8 h   | 100            | 6.3                    | 4         |
| Q <sub>5</sub> IMo <sub>6</sub> O <sub>24</sub>                   | DBT     | O <sub>2</sub> | 85 °C, 10 mg/50 mL, 7 h   | 100            | 7.1                    | 4         |
| Q <sub>5</sub> IMo <sub>6</sub> O <sub>24</sub>                   | DBT     | O <sub>2</sub> | 90 °C, 10 mg/50 mL, 6 h   | 100            | 8.3                    | 4         |
| Q <sub>5</sub> IMo <sub>6</sub> O <sub>24</sub>                   | DBT     | O <sub>2</sub> | 100 °C, 10 mg/50 mL, 3 h  | 100            | 16.7                   | 4         |
| Q <sub>3</sub> Co(OH) <sub>6</sub> Mo <sub>6</sub> O <sub>1</sub> | DBT     | O <sub>2</sub> | 80 °C, 11 mg/25 mL, 7 h   | 100            | 2.3                    | 5         |
| Pt/h-BN                                                           | DBT     | air            | 110 °C, 50 mg/40 mL, 6 h  | 55.0           | 8.6                    | 6         |
| Pt/h-BN                                                           | DBT     | air            | 120 °C, 50 mg/40 mL, 6 h  | 62.0           | 9.7                    | 6         |
| Pt/h-BN                                                           | DBT     | air            | 130 °C, 50 mg/40 mL, 6 h  | 98.0           | 15.3                   | 6         |
| MoOx/MC-600                                                       | DBT     | air            | 110 °C, 10 mg/20 mL, 8 h  | 43.3           | 0.7                    | 7         |
| MoOx/MC-600                                                       | DBT     | air            | 115 °C, 10 mg/20 mL, 8 h  | 83.4           | 1.3                    | 7         |
| MoOx/MC-600                                                       | DBT     | air            | 120 °C, 10mg/20 mL, 4 h   | 97.1           | 2.9                    | 7         |
| MIL-101(Cr)                                                       | DBT     | O <sub>2</sub> | 120 °C, 5 mg/10 mL, 4 h   | 100            | 19.9                   | 8         |
| V <sub>2</sub> O <sub>5</sub> /BNNS                               | DBT     | air            | 110 °C, 200 mg/50 mL, 4 h | 72.4           | 0.6                    | 9         |
| V <sub>2</sub> O <sub>5</sub> /BNNS                               | DBT     | air            | 120 °C, 200 mg/50 mL, 4 h | 100            | 0.9                    | 9         |
| V <sub>2</sub> O <sub>5</sub> /BNNS                               | DBT     | air            | 130 °C, 200 mg/50 mL, 3.5 | 100            | 1.0                    | 9         |
| V <sub>8</sub> @iPAF                                              | DBT     | O <sub>2</sub> | 80 °C, 20 mg/6 mL, 5 h    | 100            | 1.0                    | 10        |
| 3DOM WOx                                                          | DBT     | air            | 120 °C, 10 mg/20 mL, 7 h  | 99.9           | 0.3                    | 11        |
| Atomic-layered                                                    | DBT     | air            | 120 °C, 10 mg/50 mL, 10 h | 99.7           | 1.8                    | 12        |

| (continued)                                                                     |     |                |                            |      |     |    |  |
|---------------------------------------------------------------------------------|-----|----------------|----------------------------|------|-----|----|--|
| V <sub>2</sub> O <sub>5</sub> BM-3                                              | DBT | air            | 120 °C, 30 mg/50 mL, 4 h   | 99.7 | 0.6 | 13 |  |
| [C <sub>8</sub> H <sub>17</sub> N(CH <sub>3</sub> ) <sub>3</sub> ] <sub>3</sub> | DBT | O <sub>2</sub> | 90 °C, 40 mg/20 mL, 8 h    | 100  | 0.3 | 14 |  |
| [C <sub>8</sub> H <sub>17</sub> N(CH <sub>3</sub> ) <sub>3</sub> ] <sub>3</sub> | DBT | O <sub>2</sub> | 100 °C, 40 mg/20 mL, 1.25  | 100  | 1.7 | 14 |  |
| [C <sub>8</sub> mim] <sub>3</sub> H <sub>3</sub> V <sub>10</sub> O <sub>2</sub> | DBT | air            | 110 °C, 80 mg/40 mL, 4 h   | 67.4 | 1.6 | 15 |  |
| [C <sub>8</sub> mim] <sub>3</sub> H <sub>3</sub> V <sub>10</sub> O <sub>2</sub> | DBT | air            | 120 °C, 80 mg/40 mL, 4 h   | 99.8 | 2.4 | 15 |  |
| [C <sub>8</sub> mim] <sub>3</sub> H <sub>3</sub> V <sub>10</sub> O <sub>2</sub> | DBT | air            | 130 °C, 80 mg/40 mL, 4 h   | 100  | 2.4 | 15 |  |
| [C <sub>8</sub> H <sub>17</sub> N(CH <sub>3</sub> ) <sub>3</sub> ] <sub>3</sub> | DBT | O <sub>2</sub> | 100 °C, 40 mg/20 mL, 2.5 h | 100  | 0.6 | 16 |  |
| Q <sub>5</sub> H <sub>4</sub> PV <sub>14</sub> O <sub>42</sub>                  | DBT | O <sub>2</sub> | 90 °C, 40 mg/20 mL, 7 h    | 100  | 0.2 | 17 |  |
| Q <sub>5</sub> H <sub>4</sub> PV <sub>14</sub> O <sub>42</sub>                  | DBT | O <sub>2</sub> | 100 °C, 40 mg/20 mL, 5 h   | 100  | 0.3 | 17 |  |
| MFM-300(V)                                                                      | DBT | O <sub>2</sub> | 120 °C, 3.75 mg/5 mL, 5 h  | 99.6 | 6.7 | 18 |  |

The column of 'Reaction conditions' contained reaction temperature (°C), catalyst dosage (mg), volume of model oil (mL), reaction time (h), respectively.

Turnover frequency (TOF, h<sup>-1</sup>) was calculated as follows:

$$TOF(h^{-1}) = \frac{S_{conv} \times C_0 \times V_{oil}/t}{m \times \omega/M}$$

$S_{conv}$ : conversion of sulfides;

$C_0$ : initial sulfur content, mol L<sup>-1</sup>;

$V_{oil}$ : volume of model oil, L;

$t$ : reaction time, h;

$m$ : mass of catalyst dosage, g;

$\omega$ : loading in the catalyst;

$M$ : atomic mass of active metal, g mol<sup>-1</sup>.



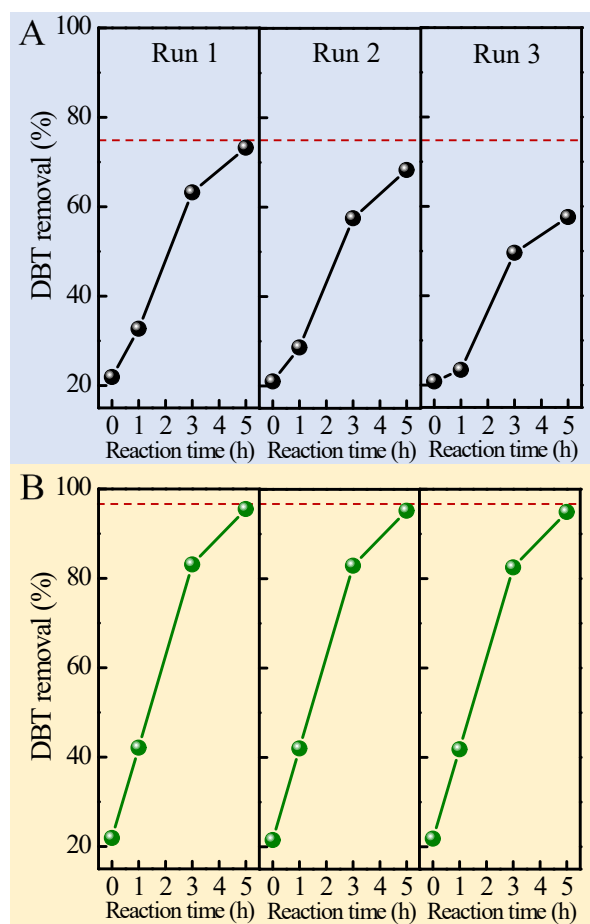

**Fig. S9** Reusability of (A) MoO<sub>3</sub>/Beta and (B) MoO<sub>3</sub>@Beta catalysts in the DBT oxidation. The used catalysts were regenerated by calcination at 600 °C for 6 h after each run. Reaction conditions: model diesel (S content of 500 μg mL<sup>-1</sup>), 20 mL; DES, 4 g; MoO<sub>3</sub>@Beta, 0.02 g; temperature, 90 °C; O<sub>2</sub> pressure, 1 atm.; flow rate of O<sub>2</sub>, 60 mL min<sup>-1</sup>.

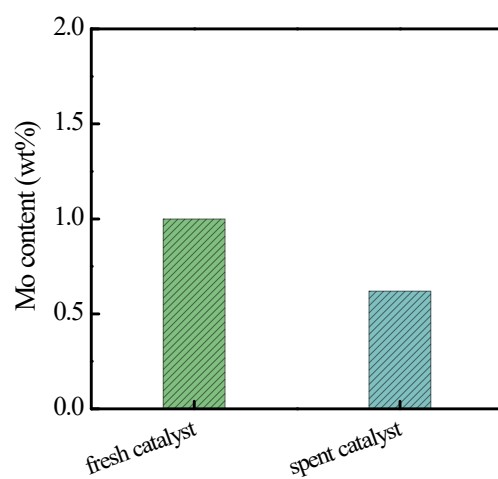

**Fig. S10** Mo content for fresh and spent MoO<sub>3</sub>/Beta catalyst.

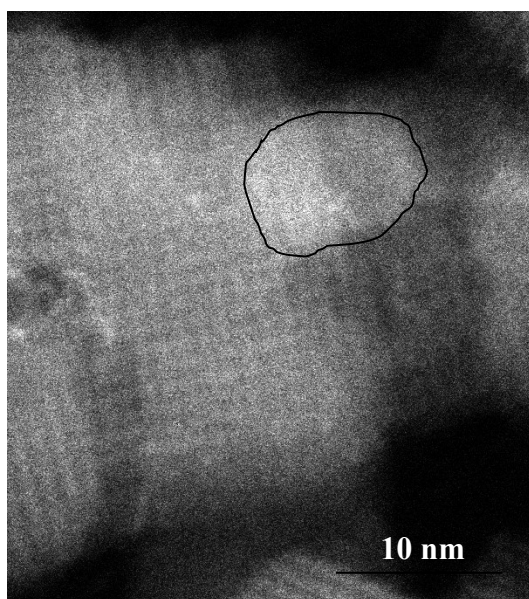

**Fig. S11** AC-HAADF-STEM image of the spent MoO<sub>3</sub>/Beta catalyst regenerated by calcination at 600 °C for 6 h.

**Table S3** Catalytic activity of O<sub>2</sub>-treated MoO<sub>3</sub>@Beta for 3 h in oxidative desulfurization of DBT with molecular O<sub>2</sub>.

| No.            | Catalyst                  | Mo loading <sup>a</sup> (wt%) | Conversion <sup>b</sup> (%) |
|----------------|---------------------------|-------------------------------|-----------------------------|
| 1 <sup>c</sup> | MoO <sub>3</sub> @Beta[O] | 0.95                          | < 1.0                       |
| 2 <sup>d</sup> | MoO <sub>3</sub> @Beta[O] | 0.95                          | < 1.0                       |

<sup>a</sup> Calculated by ICP.

<sup>b</sup> Conversion = moles of DBT converted/initial moles of DBT × 100%.

<sup>c</sup> Reaction conditions: catalyst, 0.02 g; model oil (S content, decalin, 500 µg mL<sup>-1</sup>), 20 mL; temperature, 90 °C; time, 5 h.

<sup>d</sup> Reaction conditions: catalyst, 0.02 g; model oil (S content, decalin, 500 µg mL<sup>-1</sup>), 20 mL; O<sub>2</sub> pressure, 1 atm.; flow rate of O<sub>2</sub>, 60 mL min<sup>-1</sup>; temperature, 90 °C; time, 5 h.

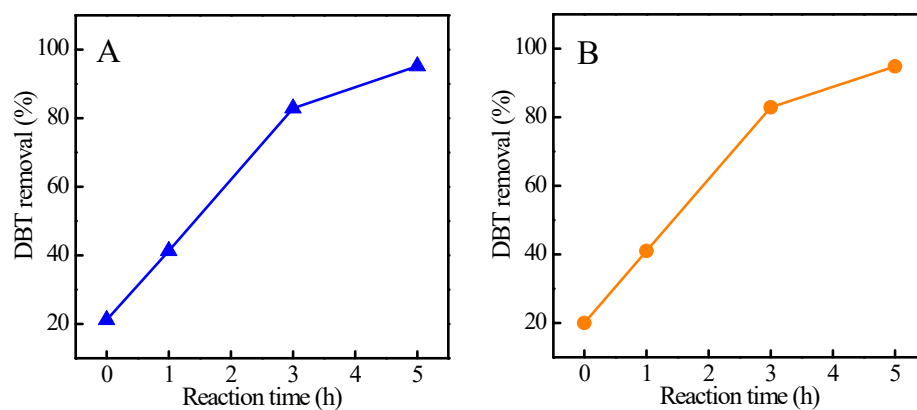

**Fig. S12** Selective quenching experiments with (A) L-histidine and (B) ethanol.

Reaction conditions: model diesel (S content of  $500 \mu\text{g mL}^{-1}$ ), 20 mL; DES, 4 g;  $\text{MoO}_3@Beta$ , 0.02 g; quencher, 50% mass ratio to DBT; temperature,  $90 \text{ }^\circ\text{C}$ ;  $\text{O}_2$  pressure, 1 atm; flow rate of  $\text{O}_2$ ,  $60 \text{ mL min}^{-1}$ .

## References

- [1] Y. Dong, J. Zhang, Z. Ma, H. Xu, H. Yang, L. Yang, L. Bai, D. Wei, W. Wang, H. Chen, Preparation of Co-Mo-O ultrathin nanosheets with outstanding catalytic performance in aerobic oxidative desulfurization, *Chem. Commun.* 55 (2019) 13995–13998, <https://doi.org/10.1039/C9CC07452J>.
- [2] Q. Zhang, J. Zhang, H. Yang, Y. Dong, Y. Liu, L. Yang, D. Wei, W. Wang, L. Bai, H. Chen, Efficient aerobic oxidative desulfurization over Co–Mo–O bimetallic oxide catalysts. *Catal. Sci. Technol.* 9 (2019) 2915–2922, <https://doi.org/10.1039/C9CY00459A>.
- [3] Y. Shi, G. Liu, B. Zhang, X. Zhang, Oxidation of refractory sulfur compounds with molecular oxygen over a Ce–Mo–O catalyst, *Green Chem.* 18 (2016) 5273–5279, <https://doi.org/10.1039/C6GC01357K>.
- [4] H. Lv, Y. Zhang, Z. Jiang, C. Li, Aerobic oxidative desulfurization of benzothiophene, dibenzothiophene and 4,6-dimethyldibenzothiophene using an anderson-type catalyst  $[(C_{18}H_{37})_2N(CH_3)_2]_5[IMo_6O_{24}]$ , *Green Chem.* 12 (2010) 1954–1958, <https://doi.org/10.1039/C0GC00271B>.
- [5] H. Lv, W. Ren, W. Liao, W. Chen, Y. Li, Z. Suo, Aerobic oxidative desulfurization of model diesel using a B-type anderson catalyst  $[(C_{18}H_{37})_2N(CH_3)_2]_3Co(OH)_6Mo_6O_{18} \cdot 3H_2O$ , *Appl. Catal. B: Environ.* (2013), 138–139, 79–83, <https://doi.org/10.1016/j.apcatb.2013.02.034>.
- [6] P.W. Wu, Y.C. Wu, L.L. Chen, J. He, M.Q. Hua, F.X. Zhu, X.Z. Chu, J. Xiong, M.Q. He, W.S. Zhu, H.M. Li, Boosting aerobic oxidative desulfurization performance in fuel oil via strong metal-edge interactions between Pt and h-BN, *Chem. Eng. J.* 380 (2020) 122526, <https://doi.org/10.1016/j.cej.2019.122526>.

- [7] W. Jiang, J. Xiao, L. Dong, C. Wang, H. Li, Y. Luo, W. Zhu, H. Li, Polyoxometalate-based poly (ionic liquid) as a precursor for superhydrophobic magnetic carbon composite catalysts toward aerobic oxidative desulfurization, *ACS Sustain. Chem. Eng.* 7 (2019) 15755–15761, <https://doi.org/10.1021/acssuschemeng.9b04026>.
- [8] A. Gomez-Paricio, A. Santiago-Portillo, S. Navalon, P. Concepcion, M. Alvaro, H. Garcia, MIL-101 promotes the efficient aerobic oxidative desulfurization of dibenzothiophenes, *Green Chem.* 18 (2016) 508–515, <https://doi.org/10.1039/C5GC00862J>.
- [9] C. Wang, Y. Qiu, H. Wu, W. Yang, Q. Zhu, Z. Chen, S. Xun, W. Zhu, H. Li, Construction of 2D-2D V<sub>2</sub>O<sub>5</sub>/BNNS nanocomposites for improved aerobic oxidative desulfurization performance, *Fuel* 270 (2020) 117498, <https://doi.org/10.1016/j.fuel.2020.117498>.
- [10] J. Song, Y. Li, P. Cao, X. Jing, M. Faheem, Y. Matsuo, Y. Zhu, Y. Tian, X. Wang, G. Zhu, Synergic catalysts of polyoxometalate@cationic porous aromatic frameworks: reciprocal modulation of both capture and conversion materials, *Adv. Mater.* 31 (2019) 1902444, <https://doi.org/10.1002/adma.201902444>.
- [11] M. Zhang, W. Liao, Y. Wei, C. Wang, Y. Fu, Y. Gao, L. Zhu, W. Zhu, H. Li, Aerobic oxidative desulfurization by nanoporous tungsten oxide with oxygen defects, *Appl. Nano Mater.* 4 (2021) 1085–1093, <https://doi.org/10.1021/acsanm.0c02639>.
- [12] C. Wang, H.P. Li, X.J. Zhang, Y. Qiu, Q. Zhu, S.H. Xun, W.S. Yang, H.M. Li, Z.G. Chen, W.S. Zhu, Atomic-layered  $\alpha$ -V<sub>2</sub>O<sub>5</sub> nanosheets obtained via fast gas-driven exfoliation for superior aerobic oxidative desulfurization, *Energy Fuels* 34 (2020), 2612–2616, <https://doi.org/10.1021/acs.energyfuels.9b04401>.
- [13] Y. Zou, C. Wang, H. Chen, H. Ji, Q. Zhu, W. Yang, L. Chen, Z. Chen, W. Zhu, Scalable and

- facile synthesis of  $V_2O_5$  nanoparticles via ball milling for improved aerobic oxidative desulfurization, *Green Energy Environ.* 6 (2021) 169–175, <https://doi.org/10.1016/j.gee.2020.10.005>.
- [14] N.F. Tang, Y.N. Zhang, F. Lin, H.Y. Jiang, Z.X. Lu, C. Li, Oxidation of dibenzothiophene catalyzed by  $[C_8H_{17}N(CH_3)_3]_3H_3V_{10}O_{28}$  using molecular oxygen as oxidant, *Chem. Commun.* 48 (2012) 11647–11649, <https://doi.org/10.1039/C2CC36482D>.
- [15] C. Wang, Z.G. Chen, X.Y. Yao, Y.H. Chao, S.H. Xun, J. Xiong, L. Fan, W.S. Zhu, H.M. Li, Decavanadates anchored into micropores of graphene-like boron nitride: efficient heterogeneous catalysts for aerobic oxidative desulfurization, *Fuel* 230 (2018) 104–112, <https://doi.org/10.1016/j.fuel.2018.04.153>.
- [16] N.F. Tang, Z.X. Jiang, C. Li, Oxidation of refractory sulfur-containing compounds with molecular oxygen catalyzed by vanadoperiodate, *Green Chem.* 17 (2015) 817–820, <https://doi.org/10.1039/C4GC01790K>.
- [17] N.F. Tang, X.P. Zhao, Z.X. Jiang, C. Li, Oxidation of dibenzothiophene using oxygen and a vanadophosphate catalyst for ultra-deep desulfurization of diesels, *Chinese J. Catal.* 35 (2014) 1433–1437, [https://doi.org/10.1016/S1872-2067\(14\)60194-7](https://doi.org/10.1016/S1872-2067(14)60194-7).
- [18] X.L. Li, Y.L. Gu, H.Q. Chu, G. Ye, W. Zhou, W. Xu, Y. Y. Sun, MFM-300(V) as an active heterogeneous catalyst for deep desulfurization of fuel oil by aerobic oxidation, *Appl. Catal. A: Gen.* 584 (2019) 117152, <https://doi.org/10.1016/j.apcata.2019.117152>.
